# Supplementary material for: Ti3C2 MXene-anchored photoelectrochemical detection of exosomes by in situ fabrication of CdS nanoparticles with enzyme-assisted hybridization chain reaction
Source: Royal Society of Chemistry journal article supplement (doi:10.1039/d2ra01545e), 2022-01-01
Supplement: d2ra01545e1.pdf [file d2ra01545e1.pdf]

## SUPPORTING INFORMATION

### **Ti<sub>3</sub>C<sub>2</sub> MXene-anchored photoelectrochemical detection of exosomes by in-situ fabrication of CdS nanoparticles with enzyme-assisted hybridization chain reaction**

Zhenli Qiu,<sup>‡ab</sup> Dechun Fan,<sup>‡a,c</sup> XiangHang Xue,<sup>a</sup> Jiayi Zhang,<sup>a</sup> Jiaolin Xu,<sup>a</sup> HaixiaLyu<sup>\*c</sup> and Yiting Chen<sup>\*ad</sup>

<sup>a</sup>College of Materials and Chemical Engineering, Minjiang University, Fuzhou 350108, China.

<sup>b</sup>Fujian Engineering and Research Center of New Chinese Lacquer Materials, Fuzhou 350108, China.

<sup>c</sup>College of Materials Science and Engineering, Fuzhou University, Fuzhou, 350108, China.

<sup>d</sup>Fujian Provincial University Engineering Research Center of Green Materials and Chemical Engineering, Fuzhou 350108, China.

*\* Corresponding author.*

*E-mail: cyt@mju.edu.cn*

*‡ These authors contributed equally to this work*

## TABLE OF CONTENTS

|                                                          |    |
|----------------------------------------------------------|----|
| <b>Experimental section</b> .....                        | S3 |
| Material and reagent .....                               | S3 |
| Preparation of CD63 aptamer-modified MBs.....            | S3 |
| Synthesis of Ti <sub>3</sub> C <sub>2</sub> MXene.....   | S4 |
| Construction of the PEC biosensor platform.....          | S4 |
| Signal amplification via HCR.....                        | S4 |
| PEC determination.....                                   | S4 |
| Polyacrylamide gel electrophoresis (PAGE) analysis ..... | S5 |
| <b>Partial results</b> .....                             | S5 |
| Fig S1 .....                                             | S5 |
| Fig S2 .....                                             | S5 |
| <b>References</b> .....                                  | S6 |

## EXPERIMENTAL SECTION

**Material and Reagents.** Fetal Bovine Serum (FBS), Streptavidin-labeled alkaline phosphatase (SA-ALP), N-hydroxysulfosuccinimide (Sulfo-NHS), 1-Ethyl-3-(3-dimethyl-aminopropyl) carbodiimide hydrochloride (EDC) and Carboxyl magnetic beads coupling kit were purchased from Sangon Bioengineering Technology Co. Ltd. (Shanghai, China). Sodium thiophosphate (TP), 1-thioglycerol (TG) were purchased from Aladdin Industrial Corp. (Shanghai, China). Exosomes were obtained from Zaiji Biotechnology Co., Ltd. (Fujian, China).  $Ti_3AlC_2$  powder was purchased from Forsman Scientific Co. Ltd. (Beijing, China). Cadmium chloride ( $CdCl_2$ ), sodium chloride (NaCl), hydrofluoric acid (HF, 40wt%) and dimethyl sulfoxide (DMSO) were purchased from Sinopharm Chemical Reagent Co. Ltd. (Shanghai, China). All other reagents are analytical grade. Ultrapure water was supplied by a Milli-Q purification system (S.A.S 67120 Molsheim, Millipore). After the end of the reaction, the material deposited on the FTO glass is collected. The oligonucleotides mentioned in this paper were all synthesized by Sangon bioengineering technology Co. Ltd. Their sequences are as follow:

Capture aptamer (CD63): 5'-NH<sub>2</sub>-TTTTTTTTTTCACCCACCTCGCTCCCGTGAC  
ACTAATGCTA-3'

Hairpin 1 (H1): 5'-biotin-TTAACCCACGCCGAATCCTAGACTCAAAGTAGTC  
TAGGATTCGGCGTG-3'

Hairpin 2 (H2): 5'-biotin-AGTCTAGGATTCGGCGTGGGTAAACACGCCGAAT  
CCTAGACTACTTTG-3'

C1: 5'-cholesterol -TTTGCCGTCGTGCCTTATTCTG-3'

C2: 5'-AGTCTAGGATTCGGCGTGGGTAAAGTTT-cholesterol-3'

The underlined sequences represent the initiator that can open the hairpin structure of H1. Bold characters in H1 and H2 represent the stem regions of the hairpins.

**Preparation of CD63 aptamer-modified MBs.** The aminated aptamer (CD63) was immobilized to carboxyl-modified magnetic beads and applied to capture exosomes. Simply speaking, 80  $\mu$ L of 50  $mg \cdot mL^{-1}$  MBs was washed three times with preserving fluid and dissolved in 150  $\mu$ L of activation buffer. Then, 20  $\mu$ L of EDC (50  $mg \cdot mL^{-1}$ ) and 20  $\mu$ L of Sulfo-NHS (50  $mg \cdot mL^{-1}$ ) were added to the solution to activate the carboxyl-modified magnetic beads, followed by mixing and incubating at room temperature for 15 min.<sup>1</sup> After the magnetic beads were fixed on the magnetic frame for 30 s, the upper waste liquid was discarded with the pipettor. 1300  $\mu$ L of 1 mM amino group modified CD63 aptamer was then covalently conjugated to

resuspend the MBs. Subsequently, 200  $\mu\text{L}$  coupling buffer was added and incubated in a rotator at room temperature for 90 min. Afterwards, 5 ml of the blocking solution was mixed well and incubated on the rotator at room temperature for 30 min. Finally, the supersolution was removed and redispersed in 1mL of buffer solution.

**Synthesis of  $\text{Ti}_3\text{C}_2$  MXene.** According to the method reported in the literature,<sup>2-4</sup> the organ-like  $\text{Ti}_3\text{C}_2$  MXene were prepared and modified. In detail, 2.0 g  $\text{Ti}_3\text{AlC}_2$  powder was immersed in 40 mL 40% HF aqueous solution and stirred at room temperature (RT) for 48 hours to etch Al. The suspension was filtered and centrifuged with deionized water until the pH was neutral, then dried at 80  $^\circ\text{C}$  for 12 hours. To achieve the exfoliation, the resulting multilayer of  $\text{Ti}_3\text{C}_2$  powder were added to 40 mL DMSO and stirred for 24 hours. The obtained mixture was centrifuged several times with deionized water to acquire the inserted powder. The collected powder was then dispersed into deionized water and layered by ultrasonic treatment. After ultrasound treatment for 1 hour, the suspension was centrifuged at 5000 rpm for 60 min to remove the superfluous unexfoliated  $\text{Ti}_3\text{C}_2$ . Finally, the supernatant containing  $\text{Ti}_3\text{C}_2$  MXene was obtained.

**Construction of the PEC biosensor platform.** Firstly, FTO conductive glass was ultrasonically cleaned three times with mixture (1:3, v/v) of deionized water and  $\text{C}_2\text{H}_5\text{OH}$ , and the FTO electrode was immersed in 0.01 M NaOH solution for 5 hours. Then, the exposure area of FTO glass was controlled to be 0.2827  $\text{cm}^2$ . The  $\text{Ti}_3\text{C}_2$  MXene/ $\text{Cd}^{2+}$  solution was obtained by adding  $\text{Ti}_3\text{C}_2$  MXenes dispersed in ethanol solution (1 mg/mL) to  $\text{CdCl}_2$  (0.2 M) and ultrasonic treatment for 2 h. Soon afterwards, 20  $\mu\text{L}$   $\text{Ti}_3\text{C}_2$  MXene/ $\text{Cd}^{2+}$  solution was uniformly dropped on the clean FTO electrode, and blow-dried with  $\text{N}_2$ . The modified  $\text{Ti}_3\text{C}_2$  MXene/ $\text{Cd}^{2+}$ /FTO was successfully obtained.

**Signal amplification via HCR.** Firstly, the different concentrations of exosomes were mixed with CD63 aptamer-modified MBs and incubated at room temperature for 2 h. Shortly afterwards, the stock solutions of H1 and H2 was heated to 95  $^\circ\text{C}$  for 5 min before use, respectively, and then allowed to gradually anneal to 25  $^\circ\text{C}$  to form the hairpin structure. Subsequently, 100  $\mu\text{L}$  of 1  $\mu\text{M}$  H1 were mixed with 100  $\mu\text{L}$  of 1  $\mu\text{M}$  H2 and incubated at 37  $^\circ\text{C}$  for 1 h. At the same time, the stock solutions of C1 and C2 were pre-hybridized from 90  $^\circ\text{C}$  to 25  $^\circ\text{C}$  at a final concentration of 1  $\mu\text{M}$  to form DNA anchor with a sticky end. After that, the MBs combined with exosomes were resuspend with 200  $\mu\text{L}$  of the above mixture, and then incubated at 37  $^\circ\text{C}$  for 1 h. After washing with PBS buffer for three times, H1 and H2 were added and then incubated in a thermostatic mixer for 1 h. The above solution was washed for three times, then SA-ALP was added and incubated for 1 h. As above, washed with PBS buffer and re-dispersed in 2mL preservation solution. Finally, 10  $\mu\text{L}$  of 0.7 M thioglycerin and 60  $\mu\text{L}$  of 8 mM sodium thiophosphate were added to the solution to react at 37  $^\circ\text{C}$  for 90 min.

**PEC determination.** The above solution (20  $\mu\text{L}$ ) was incubated for 30 min on the PEC biosensor to obtain FTO/MXenes/CdS. Finally, FTO/ $\text{Ti}_3\text{C}_2$ MXene/CdS was inserted into the test solution (0.1 M  $\text{Na}_2\text{SO}_4$ )

and the PEC response was recorded under xenon lamp irradiation at a potential of 0 V (vs. SCE). And then the photocurrent responses were recorded using an electrochemical workstation (CH Instruments, 760D, USA).

**Polyacrylamide gel electrophoresis (PAGE) analysis.** 4  $\mu\text{L}$  of different DNA solutions were mixed with 2  $\mu\text{L}$  of 6 $\times$  glycerin loading buffer and then loaded into 1 $\times$  TRIS-Borate-EDTA (TBE) buffer in 12% polyacrylamide gel, respectively. Electrophoresis tank (Dingguo, DG-24DN, China) was performed on the electrophoresis apparatus (Dingguo, DL-300C, China) at constant pressure of 200 V for 45 min. The gel was dyed 4 S red plus for about 90 min and then rinse with ultrapure water. Finally, the gel was photographed by a fully automatic gel image analysis system (Peiqing, JS-2012, China).

## PARTIAL RESULTS

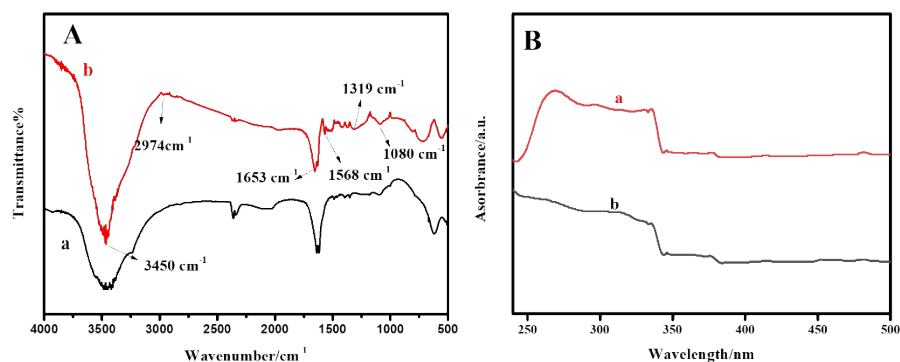

Fig S1. (A) FT-IR spectra of (a) carboxy-modified MBs and (b) CD63 modified MBs, (B) UV-vis absorption spectra of (a) CD63-MBs conjugate and (b) carboxy-modified MBs.

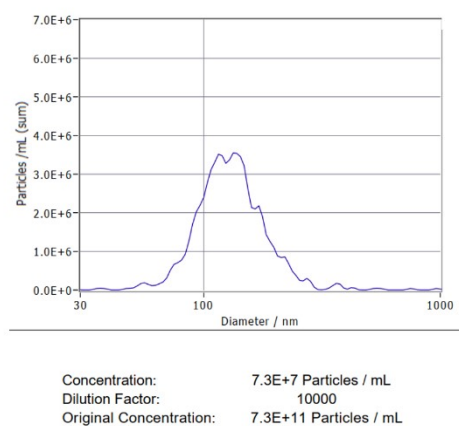

Fig S2. Size distribution of exosomes measured by NTA.

## References

1. Y. Wang, L. B. Z. Liu and D. W. Pang, *Anal. Chem.*, 2011, **83**, 8130-8137.
2. S. W. Cao , B. J. Shen, T. Tong, J. W. Fu, J. G. Yu, *Adv. Funct. Mater.*, 2018, **28**, 1800136.
3. Y. Xu, S. Wang, J. Yang, B. Han, R. Nie, J. Wang, J. Wang and H. Jing, *Nano Energy*, 2018, **51**, 442-450.
4. M. Naguib, M. Kurtoglu, V. Presser, J. Lu, J. Niu, M. Heon, L. Hultman, Y. Gogotsi, M. W. Barsoum, *Adv. Mater.*, 2011, **23**, 4248-4253.
